# Supplementary material
Source: PubMed Central journal article supplement (PMC5823770)
Supplement: NIHMS931209-supplement-Methods_and_Material.pdf [file NIHMS931209-supplement-Methods_and_Material.pdf]

## 1 MATERIALS AND METHODS

2

### 3 Study design and populations

4 We performed a cross-sectional study to determine the association between genome-wide  
5 DNA methylation and age-independent cardiovascular risk (CVR). We defined two  
6 complementary approaches to identify this CVR, considering it as (a) a continuous trait,  
7 using the residuals from the association between CVR and age (residuals approach) and (b)  
8 a discrete trait, using the difference between vascular and chronological age ( $\Delta$ age  
9 approach). We designed a two-stage EWAS for each approach.

10 The two populations used in this study have been described in previous EWAS performed in  
11 our group.<sup>1</sup> Briefly, in the discovery stage, we used data from the follow-up visit of the  
12 REGICOR (REGistre Gironí del COR) cohort in 2009-2013 (n=4980; response rate, 78.4%).  
13 This cohort includes participants from towns representing the urban and rural diversity of  
14 Girona Province (Spain)<sup>2</sup> who continued to reside in the same towns where they were  
15 originally enrolled in 2003-2005. We randomly selected a subsample of 648 individuals, all of  
16 European descent. The study was approved by the local ethics committee and meets the  
17 principles expressed in the Declaration of Helsinki and the relevant Spanish legislation. All  
18 participants provided informed written consent prior to the studies.

19 In the validation stage, we obtained data from the Framingham Offspring Study through the  
20 database of Genotypes and Phenotypes (dbGAP, <http://dbgap.ncbi.nlm.nih.gov>; project  
21 number #9047). We included the exam 8 participants with available DNA methylation data  
22 (n=2,568).

23 REGICOR data were used for cross-sectional assessment of the association between  
24 classical vascular risk factors (VRF) and CpGs showing differential methylation in relation to  
25 age-independent CVR. Finally, we built an epigenetic risk score and assessed its association  
26 with arterial stiffness in the REGICOR cohort, and with incident coronary and cardiovascular  
27 events in the Framingham cohort.

28

### 29 Vascular risk factors measurement and estimation of the age-independent 30 cardiovascular risk

31 The procedures used to measure VRFs and to collect data and samples from both  
32 populations have already been described.<sup>1</sup> Briefly, examinations and fasting blood  
33 extractions were performed and questionnaires administered by a group of trained nurses in  
34 the REGICOR study. Standardized methods and questionnaires were used to collect

35 sociodemographic, lifestyle, and VRFs information. Further details on the measurement of  
36 the biochemical parameters representing the VRFs are extensively described elsewhere.<sup>1</sup> In  
37 the Framingham Offspring Study, measurements and data were obtained through dbGaP  
38 and correspond to examination 8.

39 We used a validated risk function (FRESCO) to estimate the CVR and vascular age of both  
40 the discovery and validation populations.<sup>3</sup> This function has been developed and validated  
41 for the Spanish population, and although the absolute CVR estimation is not valid for the  
42 American population, the estimation of vascular age and of the residuals from CVR/age  
43 association can be used in any population regardless of any difference in absolute CVR.<sup>4</sup> As  
44 the FRESCO function is only valid to estimate CVR of individuals between 35 and 79 years  
45 old,<sup>3</sup> we excluded those younger and older than this chronological age range. We also  
46 excluded those individuals with no available information for any of the VRFs considered in  
47 the risk function. We used both of these REGICOR and Framingham Offspring Cohort  
48 populations in the residuals approach. For the  $\Delta$ age approach, we further excluded those  
49 individuals whose vascular age was <35 or >79 years.

50

## 51 **Assessment of DNA methylation status**

52 DNA extraction and methylation assessment have been fully described in a previous report.<sup>1</sup>  
53 In brief, DNA was extracted from whole peripheral blood in the REGICOR cohort, and from  
54 buffy coat in the Framingham Offspring Study. Genome-wide DNA methylation was  
55 assessed using the Infinium HumanMethylation450 BeadChip (Illumina, CA, USA), according  
56 to the standard protocol. This array is based on bisulfite conversion of unmethylated  
57 cytosines across the genome, and analyzes over 485,000 CpGs per sample.<sup>5</sup>

58 Analysis and quality control of the raw data has also been previously described.<sup>1</sup> Methylation  
59 status at each CpG site was reported by both M-values and  $\beta$ -values. Equation 1 was used  
60 to calculate the M-values, while Equation 2 was applied to estimate the  $\beta$ -values.

61 
$$M_{\text{value}} = \log_2 \left( \frac{M_i + \alpha}{U_i + \alpha} \right) \quad \text{Equation 1}$$

62 
$$\beta_{\text{value}} = \frac{M_i}{M_i + U_i + \alpha} \quad \text{Equation 2}$$

63 Where:

- 64 -  $M_i$  = intensity of methylated probes,
- 65 -  $U_i$  = intensity of unmethylated probes, and
- 66 -  $\alpha$  = constant offset ( $\alpha=1$  and  $\alpha=100$  in the respective equations).

67 M-values close to 0 mean the CpG site is half-methylated. Positive M-values indicate the  
68 presence of more methylated than unmethylated cytosines, while negative M-values denote  
69 the opposite ratio.  $\beta$ -values range between 0 (completely unmethylated) and 1 (completely  
70 methylated).

71 Owing to its statistical robustness, we used standardized M-values in the EWASs and the  
72 metaanalysis. Moreover, to control for batch effect we standardized the M-values by batch  
73 using Equation 3:<sup>1</sup>

74 
$$Z = \frac{X - \bar{X}}{\sqrt{\frac{\sum(X - \bar{X})^2}{n - 1}}} \quad \text{Equation 3}$$

75 Where:

- 76 - Z = standardized M-value,
- 77 - X = M-value for a specific individual,
- 78 -  $\bar{X}$  = mean of M-value for a specific batch, and
- 79 - n = sample size.

80 For the development of methylation risk scores (MRS) we used  $\beta$ -values, normalized by  
81 applying the Dassen method<sup>6</sup>, of the CpGs identified as differentially methylated in relation to  
82 age-independent CVR.

83 Information about each CpG location in the genome was obtained using the annotation  
84 provided by Illumina (HumanMethylation450 v1.2 Manifest File.csv, [www.illumina.com](http://www.illumina.com)) and  
85 Genome Browser.<sup>7</sup>

86

### 87 **Subclinical atherosclerosis measurement: arterial stiffness**

88 Two trained technicians performed the ultrasonographic evaluation of the selected subjects  
89 utilizing a 10MHz probe (Acuson XP128) and specific acquisition software (Acuson-Siemens;  
90 Mountainview, California, United States). Longitudinal images of left and right common  
91 carotid arteries were obtained with M-Mode and B-Mode, and stored for offline analysis.  
92 Acquired images were analyzed applying a standardized protocol and software.<sup>8</sup> Inter-  
93 adventitial systolic (SD) and diastolic diameter (DD) were quantified in the proximal  
94 centimeter from the carotid bulb, following international recommendations.<sup>9</sup>

95 Stiffness of the common carotid artery was estimated by calculating the distensibility  
96 coefficient (DC),<sup>10</sup> following equation 4:

97 
$$DC = \frac{3 \Delta D \cdot DD + \Delta D^2}{\frac{FF}{\Delta P} \cdot DD^3} \quad \text{Equation 4}$$

98 Where:

- 99 -  $\Delta D$  = strain or delta diameter (calculated as  $SD-DD$ ),
- 100 -  $DD$  = diastolic diameter, and
- 101 -  $PP$  = brachial pulse pressure (calculated as the difference between the systolic blood  
102 pressure [ $SBP$ ] and the diastolic blood pressure [ $DBP$ ]).

103 In Equation 4,  $DD$  and  $\Delta D$  are expressed in meters, whereas  $PP$  is expressed in mmHg. The  
104 resulting  $DC$  is expressed in  $10^{-3} \cdot kPa^{-1}$ . This index represents the stroke change in an  
105 artery's cross-sectional area, normalized for the total diastolic cross-sectional area, in  
106 response to a stress represented by  $PP$ . The lower the  $DC$ , the higher the arterial stiffness.

107 Additionally, carotid Pulse Wave Velocity ( $PWV$ ) was calculated using the Bramwell-Hill  
108 equation (equation 5):<sup>10</sup>

$$109 \quad PWV = \sqrt{\frac{1}{DC \cdot \rho}} \quad \text{Equation 5}$$

110 Where:

- 111 -  $DC$  = distensibility coefficient, and
- 112 -  $\rho$  = blood density, assumed as  $1050 \text{ Kg/m}^3$ .

113

#### 114 **Clinical cardiovascular events assessment**

115 We obtained data from the Framingham Offspring Study through the database of Genotypes  
116 and Phenotypes (dbGAP; <http://dbgap.ncbi.nlm.nih.gov>; project number #9047). We used  
117 exam 8 as the baseline visit and the follow-up included events recorded until exam 12.

118

#### 119 **Statistical analysis**

120 Robust multivariable linear regression was used in the EWAS analyses. We considered DNA  
121 methylation as the outcome and  $CVR$  independent of age as the exposure or independent  
122 variables.  $CVR$  independent of age was considered as (a) the residuals from  $CVR/age$   
123 association, and (b) the difference between vascular and chronological age.

124 To increase the sensitivity of our study, we defined four models for each approach (residuals  
125 and  $\Delta age$ ). In model 1, standardized  $M$ -values were adjusted for three confounders: sex,  
126 age, and estimated cell count. In model 3, they were additionally adjusted for smoking status.  
127 Models 2 and 4 contained the same covariates as models 1 and 3, respectively, but were  
128 further adjusted for surrogate variables to control for unmeasured confounding.<sup>11</sup> Cell count

129 was estimated using Houseman's algorithm implemented in R::minfi,<sup>12,13</sup> while surrogate  
130 variables were assessed using the R::sva R package.<sup>14</sup>

131 We validated those CpGs associated with age-independent CVR which exceeded an  
132 arbitrary P-value threshold of  $1 \cdot 10^{-5}$  for any of the four models in each approach. Then, we  
133 performed a fixed-effects metaanalysis weighted by the inverse of the variance using data  
134 from the discovery and validation stages for Model 2 in both approaches. We focused on  
135 Model 2 for two main reasons: (1) the smoking status used as a covariate in models 2 and 4  
136 is a well-known CVR factor, and (2) models adjusted for surrogate variables are preferred in  
137 omics data analysis. We defined as statistically significant any association fulfilling the  
138 Bonferroni criteria ( $P\text{-value} < 1.17 \cdot 10^{-7}$ ; calculated as  $0.05/427,948$  probes that passed the  
139 quality control).

140 To further study whether the validated CpGs were associated with one or more individual  
141 VRFs, or with none of them individually, we assessed this association in the REGICOR and  
142 Framingham populations. Considering methylation as the outcome, we used a multivariable  
143 linear regression model adjusted for triglycerides, total and HDL cholesterol, systolic and  
144 diastolic blood pressures, body mass index (BMI), smoking, diabetes, sex, age, and cell type.  
145 In the case of blood pressure and lipid levels, we performed the analyses in subsamples of  
146 non-treated individuals.

147 Based on the validated CpGs, we developed a weighted MRS, considering normalized  $\beta$ -  
148 values, for each approach in both populations. These four MRS models summarize an  
149 individual's epigenetic predisposition to higher age-independent CVR. The weights for each  
150 CpG were based on the coefficients of the metaanalysis of normalized  $\beta$ -values from Model 2  
151 following Equation 6:

$$MRS = \sum_{i=1}^N \beta_i^{meta} \cdot \beta_i^{norm} \quad \text{Equation 6}$$

153 Where:

- 154 -  $MRS$  = methylation risk score for a specific individual,
- 155 -  $i$  = CpG,
- 156 -  $N$  = CpG sample size,
- 157 -  $\beta^{meta}$  = coefficient of the metaanalysis for each CpG,
- 158 -  $\beta^{norm}$  = normalized  $\beta$ -value for each CpG,

159

160 Since MRSs were estimated in different units in each approach, they were standardized to  
161 further test them, according to Equation 7.

162

$$MRS_z = \frac{MRS - \overline{MRS}}{\sqrt{\frac{\sum (MRS - \overline{MRS})^2}{(n-1)}}}$$

Equation 7

163 Where:

- 164 -  $MRS_z$  = standardized methylation risk score,
- 165 -  $MRS$  = methylation risk score for a specific individual,
- 166 -  $\overline{MRS}$  = mean of methylation risk scores for a specific CpG, and
- 167 -  $n$  = population sample size.

168 Finally, we evaluated the association between these standardized MRSs and clinical and  
169 subclinical measurements of atherosclerosis. Multivariable linear regression was used in the  
170 analysis of the association between MRSs and subclinical parameters (arterial distensibility  
171 and pulse wave velocity) in REGICOR. We analyzed the association between MRSs and  
172 CVD and CHD incidence in Framingham data, using Cox regression. All analyses were  
173 adjusted for age and sex (model 1) and the VRFs considered in the FRESCO risk function  
174 (age, sex, total and HDL cholesterol, diabetes, smoking status, SBP, and hypertensive  
175 treatment, model 2).

176 All statistical analyses were performed using RStudio software (version 3.1.2).

177

## 178 **References**

- 179 1. Sayols-Baixeras S, Subirana I, Lluís-Ganella C, et al. Identification and validation of seven  
180 new loci showing differential DNA methylation related to serum lipid profile: an epigenome-  
181 wide approach. The REGICOR study. *Hum Mol Genet.* 2016;25:ddw285.
- 182 2. Grau M, Subirana I, Elosua R, Solanas P, Ramos R, Masiá R, Cerdón F, Sala J, Juvinyà  
183 D, Cerezo C, Fitó M, Vila J, Covas MI, Marrugat J. Trends in cardiovascular risk factor  
184 prevalence (1995-2000-2005) in northeastern Spain. *Eur J Cardiovasc Prev Rehabil.*  
185 2007;14:653-659.
- 186 3. Marrugat J, Subirana I, Ramos R, et al. Derivation and validation of a set of 10-year  
187 cardiovascular risk predictive functions in Spain: The FRESCO Study. *Prev Med.*  
188 2014;61:66-74.
- 189 4. Cuende JI, Cuende N, Calaveras-Lagartos J. How to calculate vascular age with the  
190 SCORE project scales: a new method of cardiovascular risk evaluation. *Eur Heart J.*  
191 2010;31:2351-2358.
- 192 5. Bibikova M, Barnes B, Tsan C, Ho V, Klotzle B, Le JM, Delano D, Zhang L, Schroth GP,  
193 Gunderson KL, Fan J-B, Shen R. High density DNA methylation array with single CpG site

194 resolution. *Genomics*. 2011;98:288-295.

195 6. Pidsley R, Y Wong CC, Volta M, Lunnon K, Mill J, Schalkwyk LC. A data-driven approach  
196 to preprocessing Illumina 450K methylation array data. *BMC Genomics*. 2013;14:293.

197 7. Speir ML, Zweig AS, Rosenbloom KR, et al. The UCSC Genome Browser database: 2016  
198 update. *Nucleic Acids Res*. 2016;44:D717-D725.

199 8. de Groot E, van Leuven SI, Duivenvoorden R, Meuwese MC, Akdim F, Bots ML, Kastelein  
200 JJ. Measurement of carotid intima–media thickness to assess progression and regression of  
201 atherosclerosis. *Nat Clin Pract Cardiovasc Med*. 2008;5:280-288.

202 9. Stein JH, Korcarz CE, Hurst RT, Lonn E, Kendall CB, Mohler ER, Najjar SS, Rembold CM,  
203 Post WS, American Society of Echocardiography Carotid Intima-Media Thickness Task  
204 Force. Use of Carotid Ultrasound to Identify Subclinical Vascular Disease and Evaluate  
205 Cardiovascular Disease Risk: A Consensus Statement from the American Society of  
206 Echocardiography Carotid Intima-Media Thickness Task Force Endorsed by the Society for  
207 Vascular Medicine. *J Am Soc Echocardiogr*. 2008;21:93-111.

208 10. Van Bortel LM, Duprez D, Starmans-Kool MJ, Safar ME, Giannattasio C, Cockcroft J,  
209 Kaiser DR, Thuillez C. Clinical applications of arterial stiffness, Task Force III:  
210 recommendations for user procedures. *Am J Hypertens*. 2002;15:445-452.

211 11. Teschendorff AE, Zhuang J, Widschwendter M. Independent surrogate variable analysis  
212 to deconvolve confounding factors in large-scale microarray profiling studies. *Bioinformatics*.  
213 2011;27:1496-1505.

214 12. Houseman EA, Accomando WP, Koestler DC, Christensen BC, Marsit CJ, Nelson HH,  
215 Wiencke JK, Kelsey KT. DNA methylation arrays as surrogate measures of cell mixture  
216 distribution. *BMC Bioinformatics*. 2012;13:86.

217 13. Aryee MJ, Jaffe AE, Corrada-Bravo H, Ladd-Acosta C, Feinberg AP, Hansen KD, Irizarry  
218 RA. Minfi: a flexible and comprehensive Bioconductor package for the analysis of Infinium  
219 DNA methylation microarrays. *Bioinformatics*. 2014;30:1363-1369.

220 14. Leek JT, Johnson WE, Parker HS, Jaffe AE, Storey JD. The sva package for removing  
221 batch effects and other unwanted variation in high-throughput experiments. *Bioinformatics*.  
222 2012;28:882-883.
